# Supplementary material for: Enantioselective Recognition of Chiral Carboxylic Acids by a β-Amino Acid and 1,10-Phenanthroline Based Chiral Fluorescent Sensor
Source: MDPI journal article supplement (doi:10.3390/s150510723), 2015-05-06
Supplement: s1 [file s1]

## Supplementary Information

**Enantioselective Recognition of Chiral Carboxylic Acids by a  $\beta$ -Amino Acid and 1,10-Phenanthroline Based Chiral Fluorescent Sensor. *Sensors* 2015, 15, 10723–10733**Yonghong Zhang <sup>1</sup>, Fangzhi Hu <sup>2</sup>, Bin Wang <sup>3</sup>, Xiaomei Zhang <sup>2</sup> and Chenjiang Liu <sup>1,3,\*</sup>

<sup>1</sup> Key Laboratory of Petroleum and Gas Fine Chemicals of Ministry of Education, School of Chemistry and Chemical Engineering, Xinjiang University, Urumqi 830046, China; E-Mail: zhzhzyh@126.com

<sup>2</sup> Chengdu Institute of Organic Chemistry, Chinese Academy of Sciences, Chengdu 610041, China; E-Mails: ssfangzhi@126.com (F.H.); xmzhang@cioc.ac.cn (X.Z.)

<sup>3</sup> Physics and Chemistry Detecting Center, Xinjiang University, Urumqi 830046, China; E-Mail: wangbin.yang@163.com

\* Author to whom correspondence should be addressed; E-Mail: pxylcj@126.com; Tel. +86-991-8581-211; Fax: +86-991-8582-809.

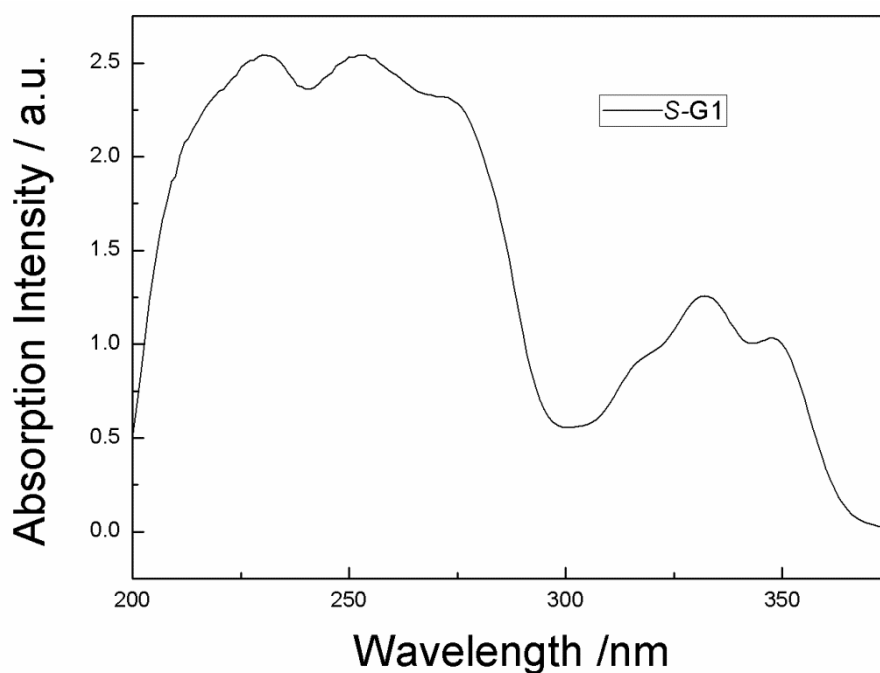

**Figure S1.** UV-Vis spectra of **S-G1** ( $8 \times 10^{-5}$  mol/L) in a solution of EtOH.

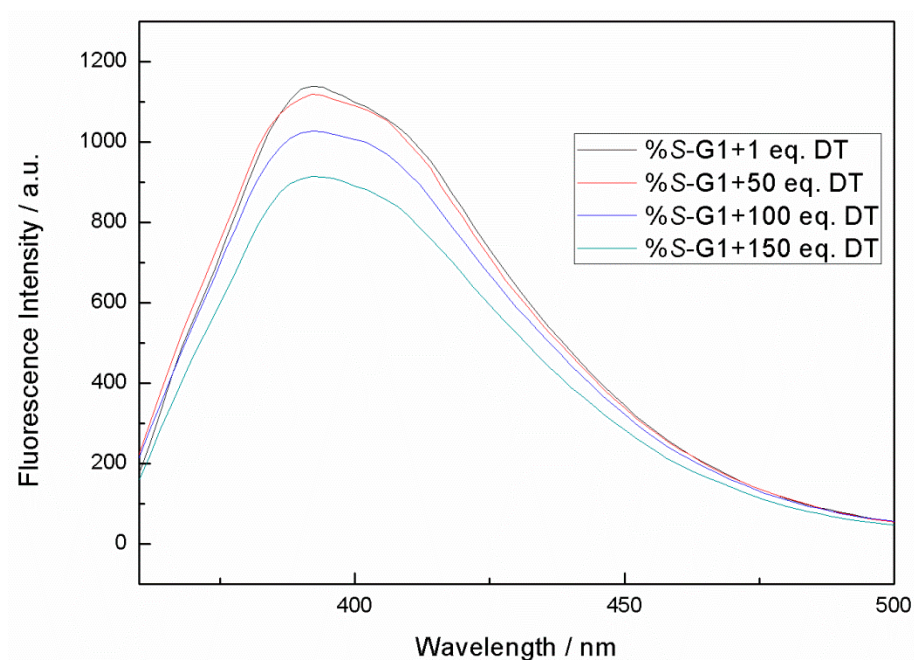

**Figure S2.** Fluorescence of *S-G1* (8×10<sup>-5</sup> mol/L) in EtOH *versus* the concentration of D-tartaric acids ( $\lambda_{\text{ex}} = 330$  nm).

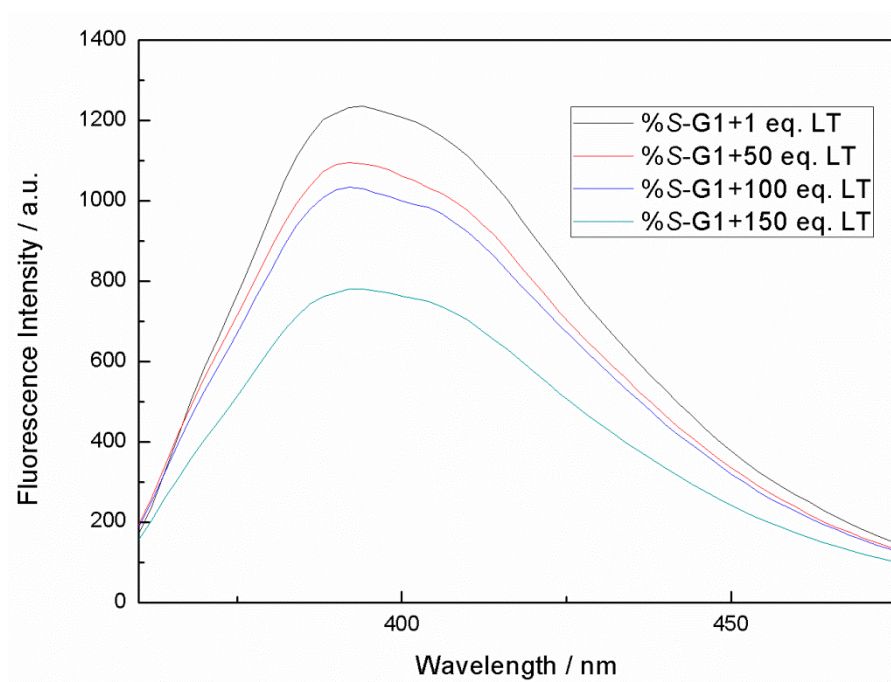

**Figure S3.** Fluorescence of *S-G1* (8×10<sup>-5</sup> mol/L) in EtOH *versus* the concentration of L-tartaric acids ( $\lambda_{\text{ex}} = 330$  nm).

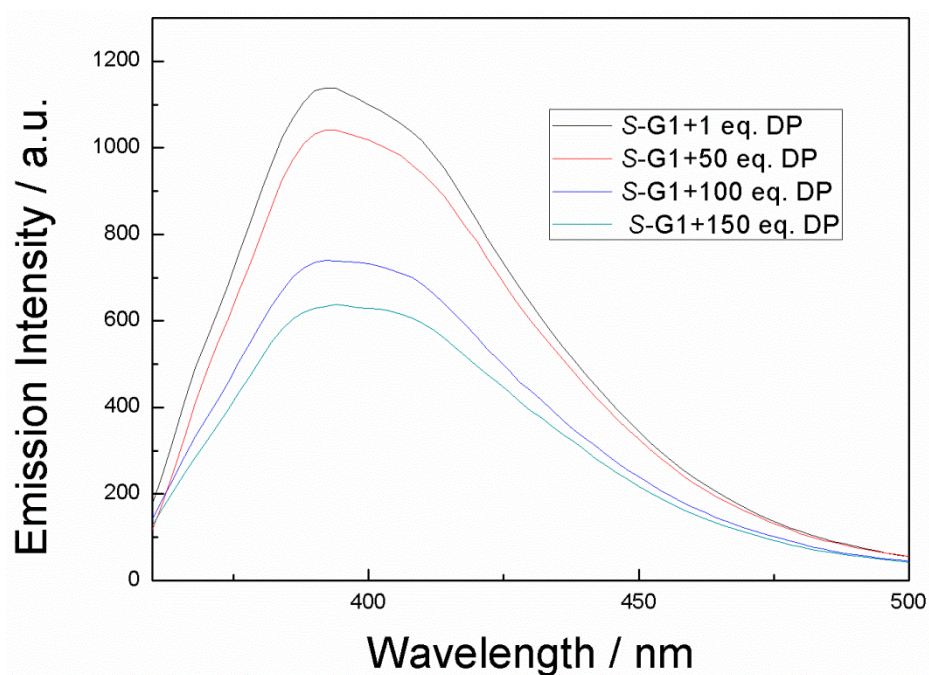

**Figure S4.** Fluorescence of **S-G1** ( $8 \times 10^{-5}$  mol/L) in EtOH *versus* the concentration of D-proline ( $\lambda_{\text{ex}}=330$  nm).

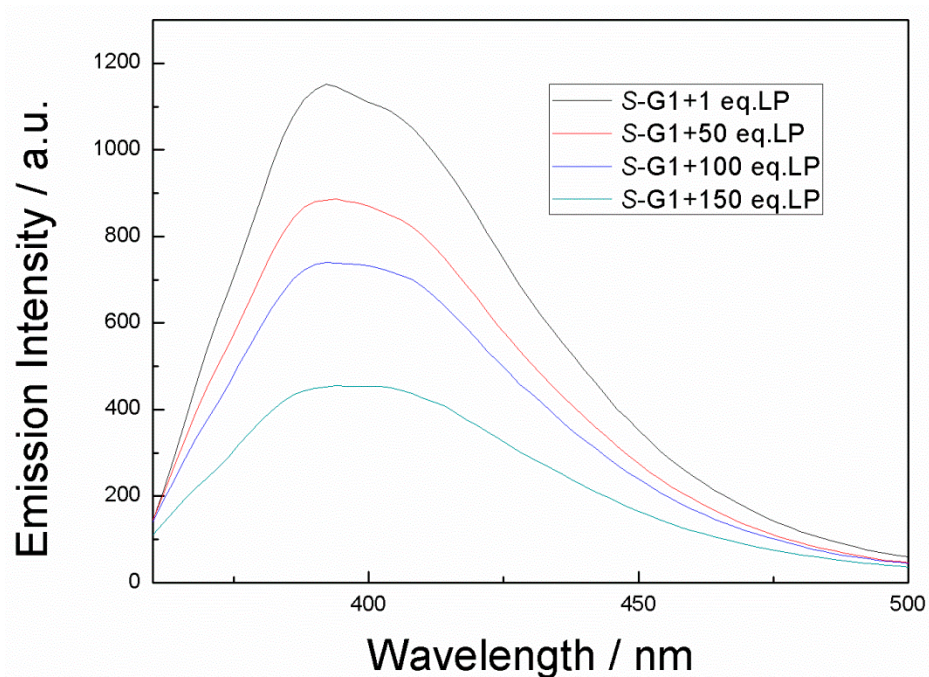

**Figure S5.** Fluorescence of **S-G1** ( $8 \times 10^{-5}$  mol/L) in EtOH *versus* the concentration of L-proline ( $\lambda_{\text{ex}}=330$  nm).

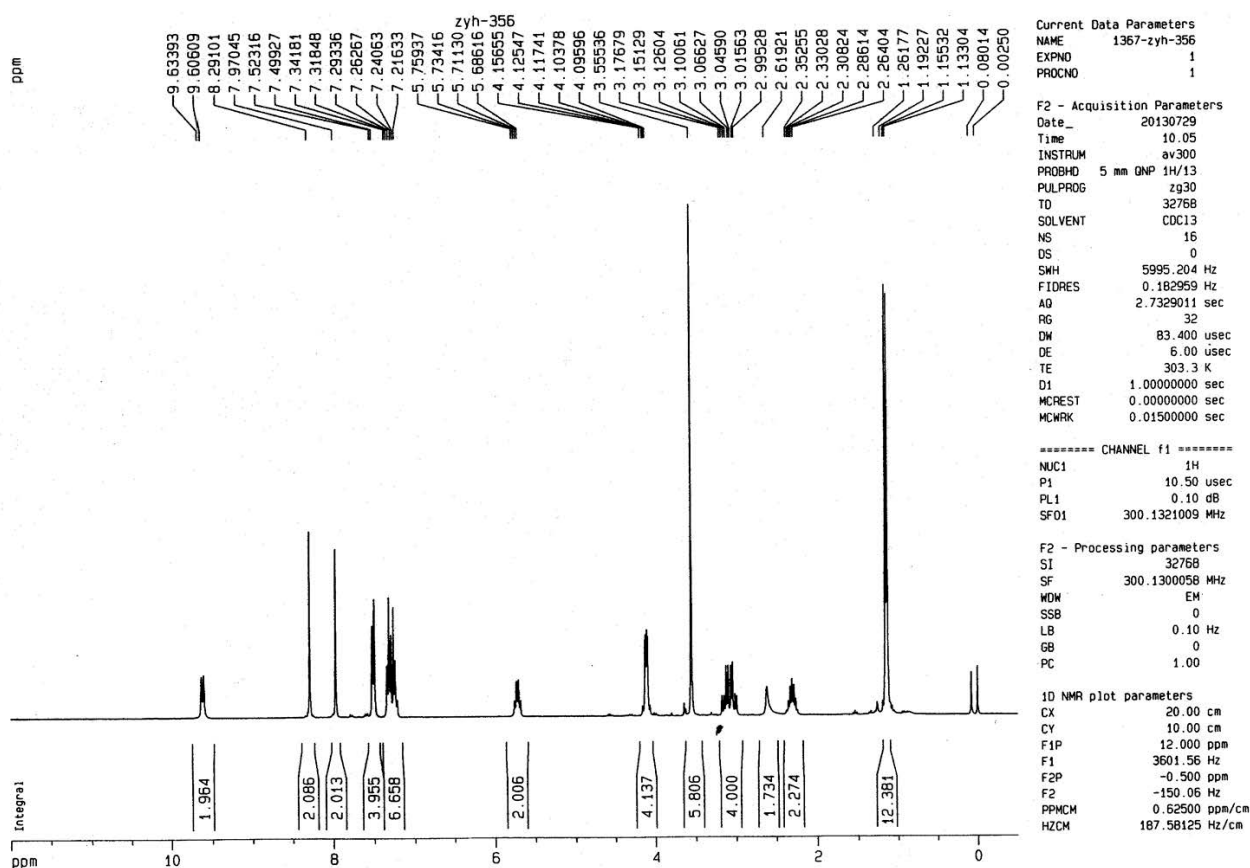Figure S6. <sup>1</sup>H NMR of *S*-G1 in CDCl<sub>3</sub>.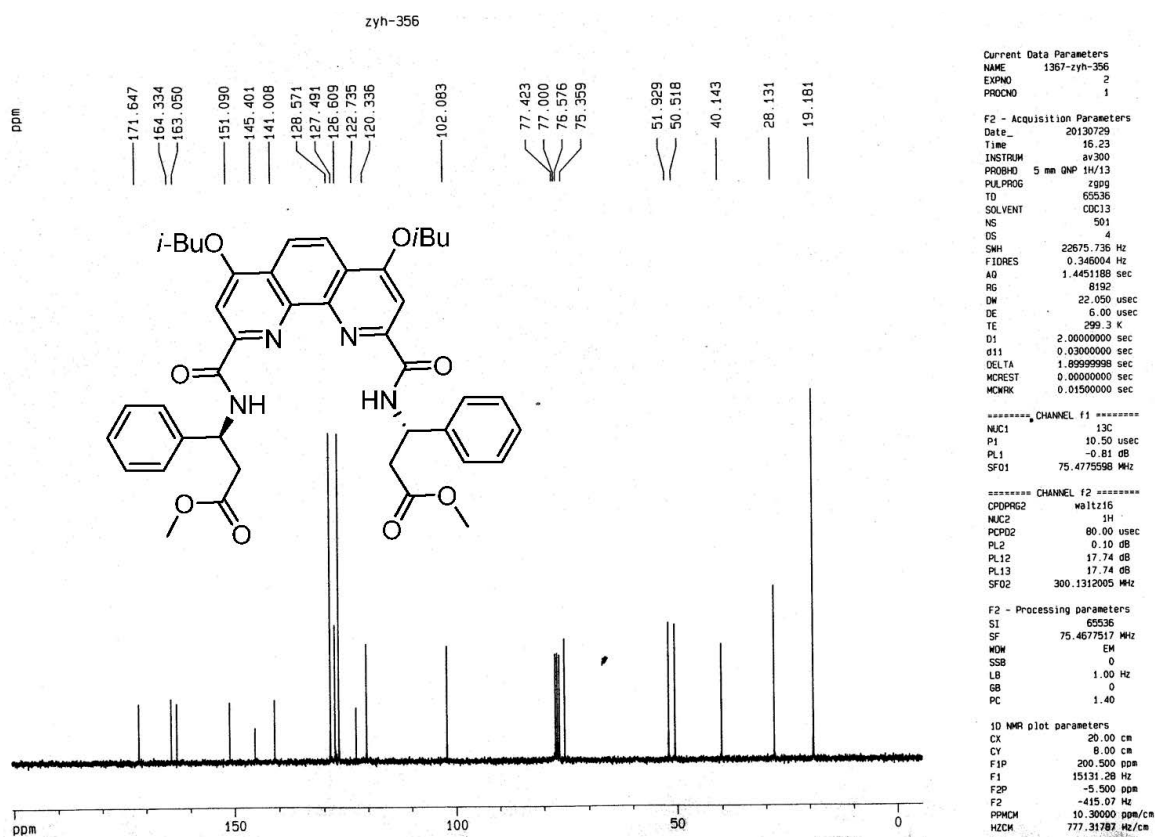Figure S7. <sup>13</sup>C NMR of *S*-G1 in CDCl<sub>3</sub>.

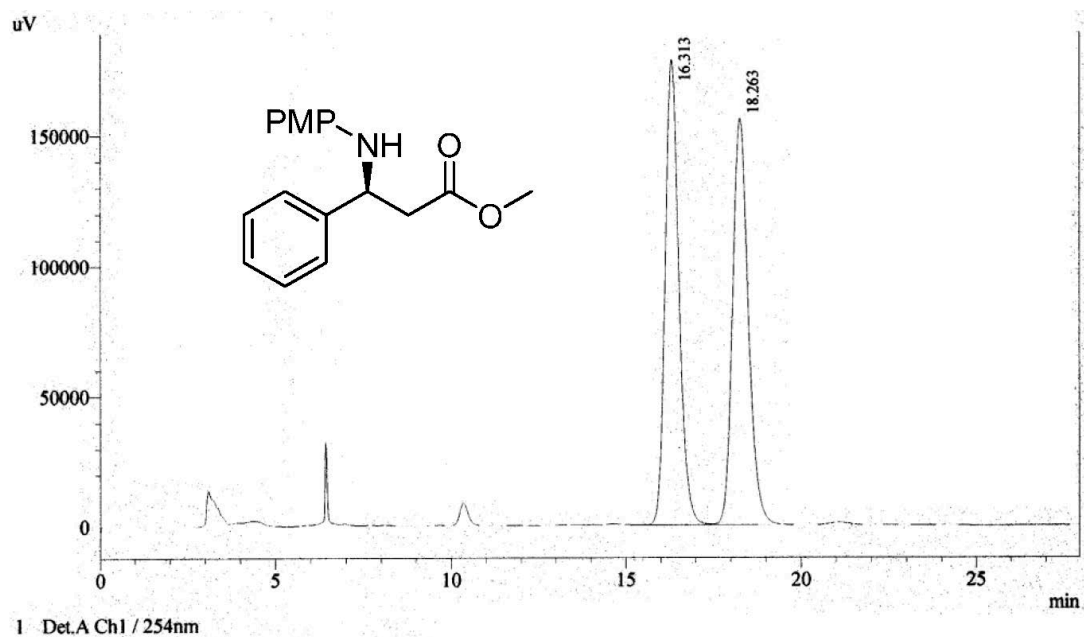

Detector A Ch1 254nm

| Peak# | Ret. Time | Area    | Height | Area %  | Height % |
|-------|-----------|---------|--------|---------|----------|
| 1     | 16.313    | 4907847 | 178797 | 50.114  | 53.397   |
| 2     | 18.263    | 4885446 | 156046 | 49.886  | 46.603   |
| Total |           | 9793293 | 334843 | 100.000 | 100.000  |

Figure S8. HPLC of racemic 1c.

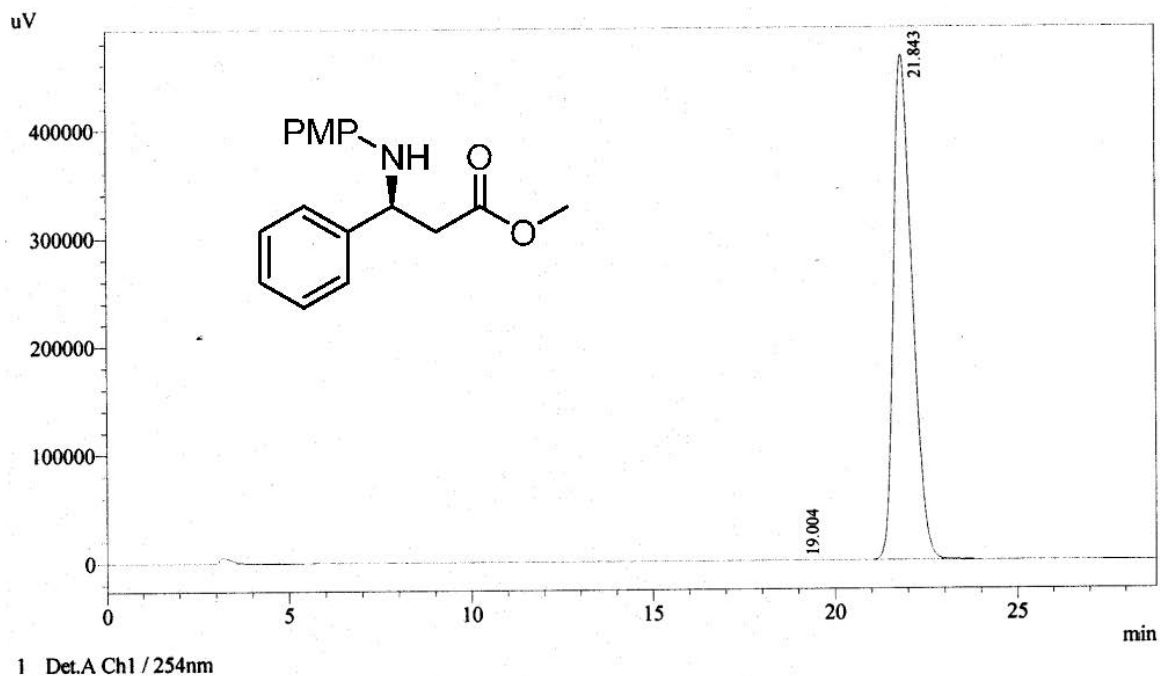

Detector A Ch1 254nm

| Peak# | Ret. Time | Area     | Height | Area %  | Height % |
|-------|-----------|----------|--------|---------|----------|
| 1     | 19.004    | 3793     | 149    | 0.023   | 0.032    |
| 2     | 21.843    | 16654636 | 466195 | 99.977  | 99.968   |
| Total |           | 16658429 | 466344 | 100.000 | 100.000  |

Figure S9. HPLC of chiral 1c.

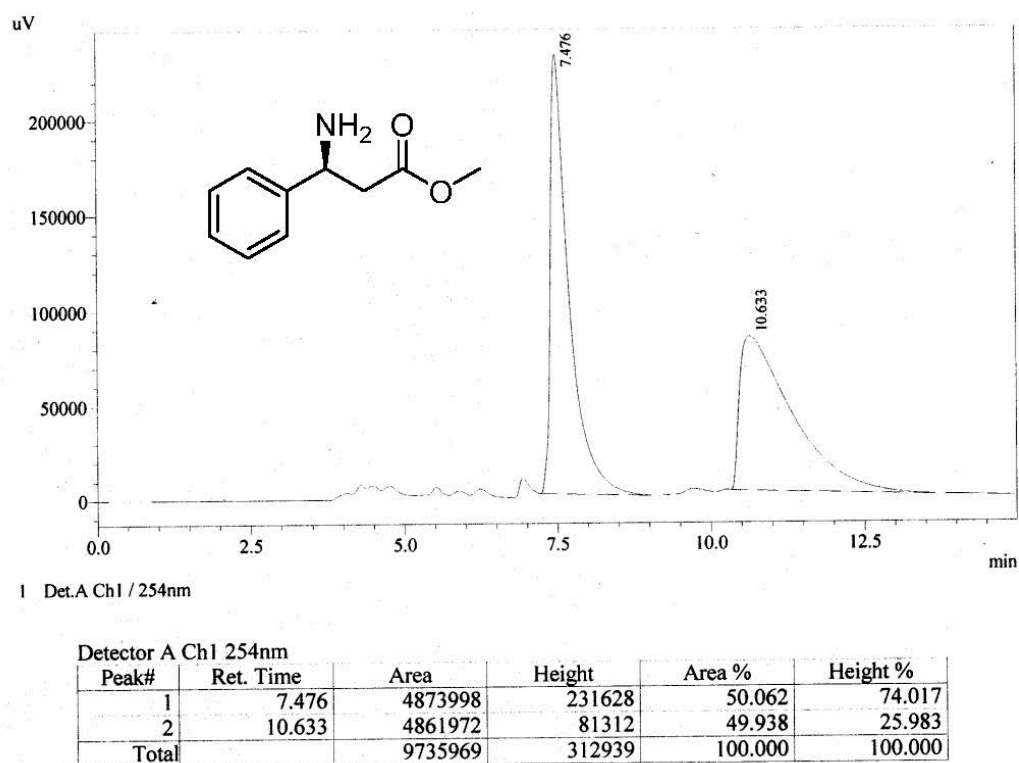

**Figure S10.** HPLC of racemic *S*-10.

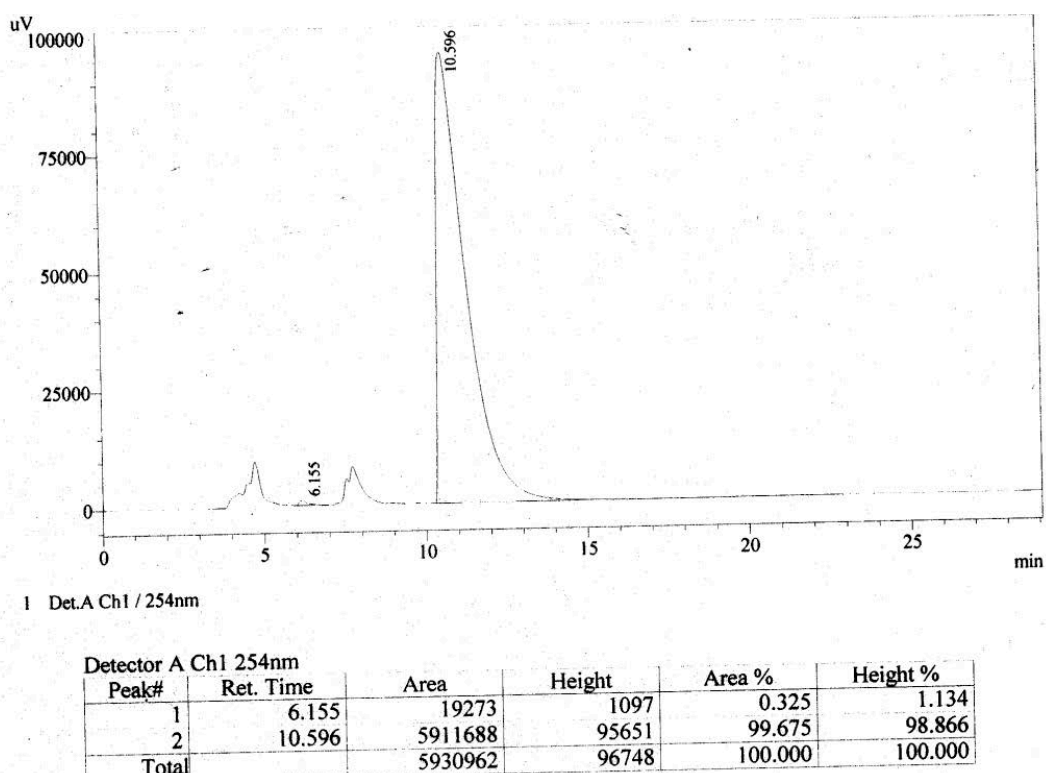

**Figure S11.** HPLC of chiral *S*-10.
